# Supplementary material for: Spheroid-based three-dimensional liver-on-a-chip to investigate hepatocyte–hepatic stellate cell interactions and flow effects
Source: Royal Society of Chemistry journal article supplement (doi:10.1039/c3lc50197c), 2013-01-01

## Supporting information

### Figure S1

Schematic diagram of the process of seeding cells into each chamber of the flow-chip. (A) A HSC suspension was introduced into the inlet port of the flow-chip through the microfluidic channels. (Red arrows indicate the direction of flow.) (B) A primary hepatocyte suspension was introduced into the inlet port of the concave flow-chip through the microfluidic channels. (Blue arrows indicate the direction of flow.)

### Figure S2

Light-microscopic images of mono-cultured spheroids formed in concave microwells. Arrows indicate disaggregation from the surface of spheroids. Scale bar = 250  $\mu\text{m}$ .

Figure S1

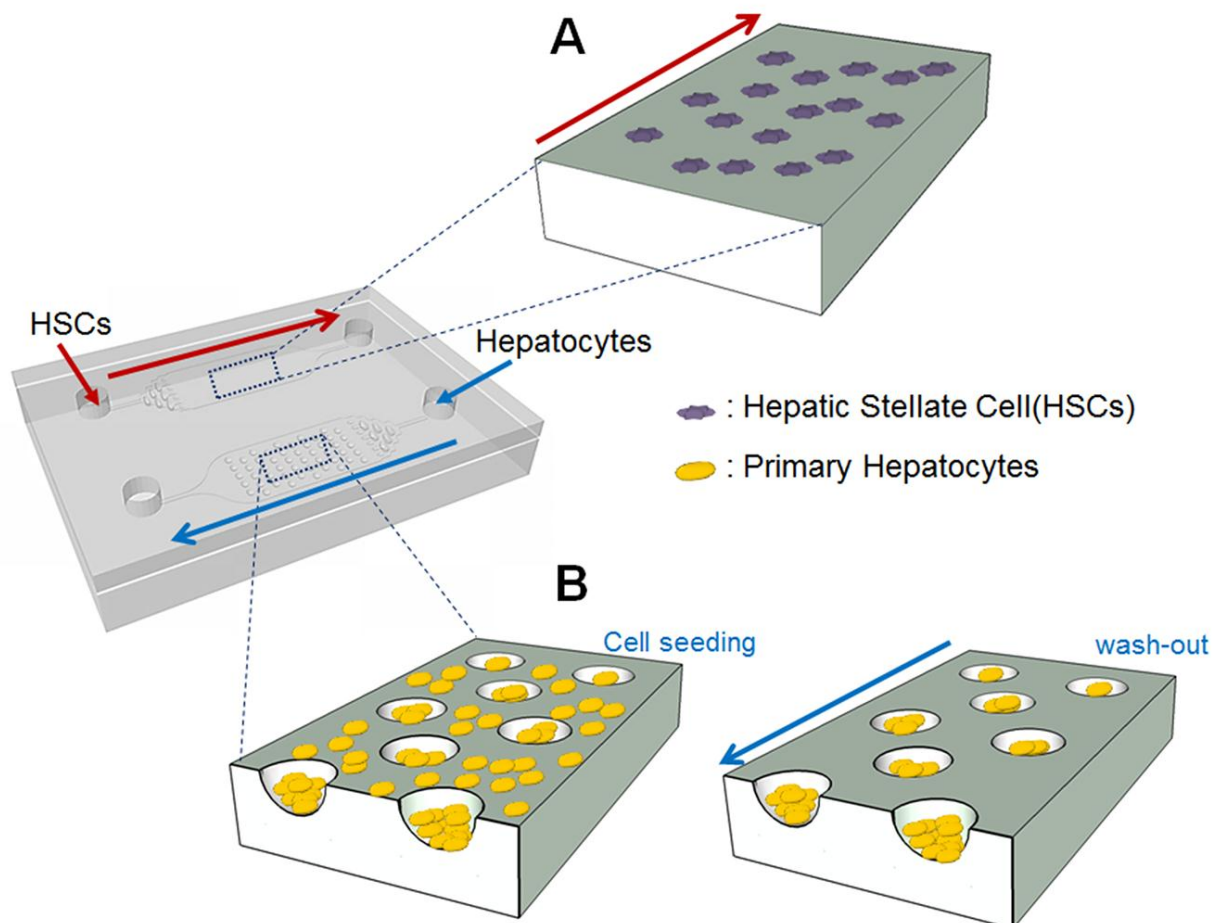

Figure S2

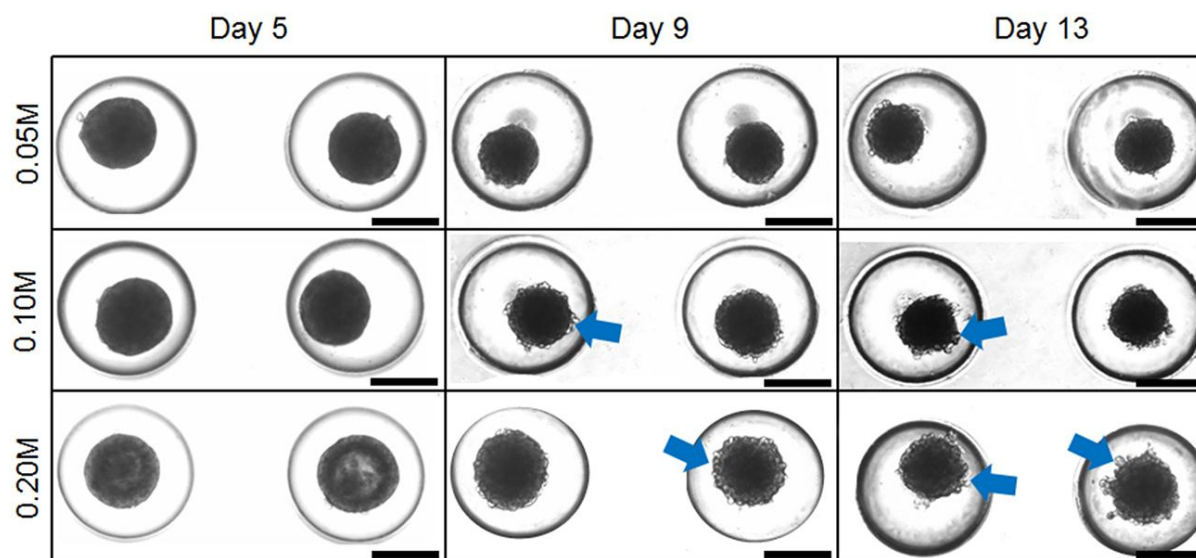

Supplement: c3lc50197c.pdf [file c3lc50197c.pdf]
